# Supplementary material
Source: PubMed Central journal article supplement (PMC6143169)
Supplement: NIHMS79445-supplement-Fig_2.pdf [file NIHMS79445-supplement-Fig_2.pdf]

**Supplemental Figure S2.** Plots showing percentage changes in total cfDNA concentration for each patient at weeks 4 and 8 of treatment, compared to same-patient baseline value. The left plot includes non-responding patients and the right plot includes patients who responded to olaparib in the clinical trial. Below, Mann-Whitney test comparing these changes at each time point for responders and non-responder patients.

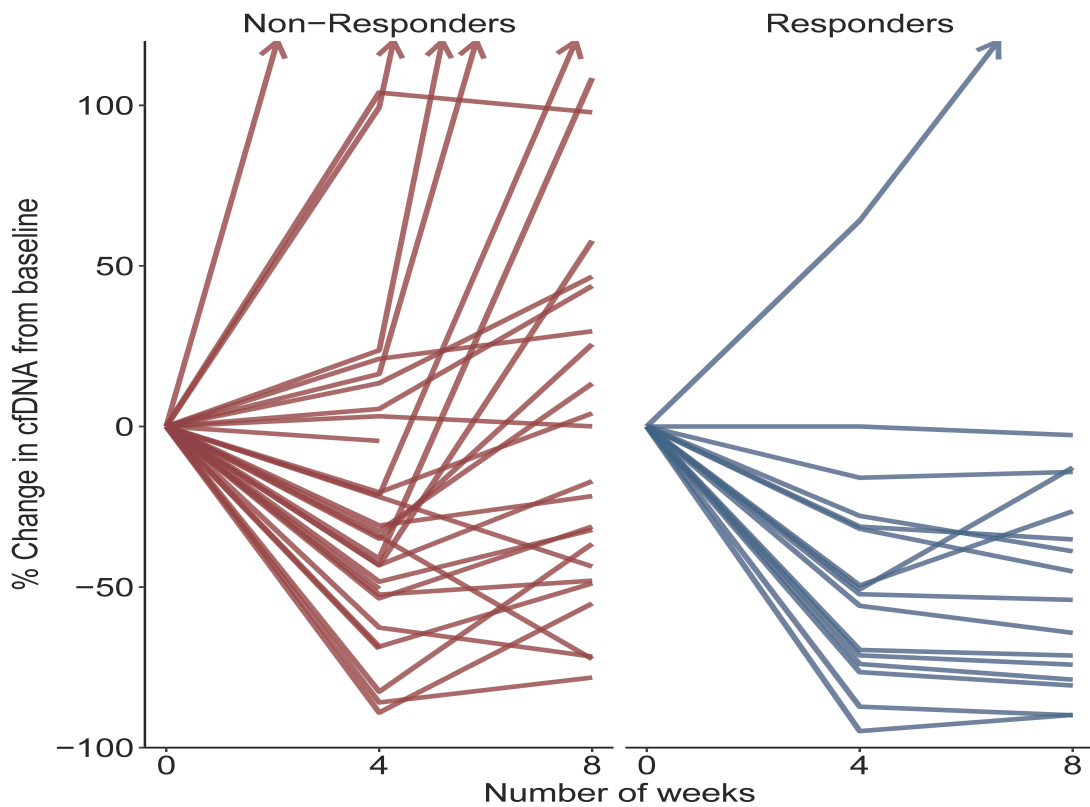

|                       | BASELINE cfDNA [ng/ml] |                   |         | WEEK 4 % CHANGE FROM BASELINE |                       |         | WEEK 8 % CHANGE FROM BASELINE |                       |         |
|-----------------------|------------------------|-------------------|---------|-------------------------------|-----------------------|---------|-------------------------------|-----------------------|---------|
|                       | N                      | Median (IQR)      | p-value | N                             | Median (IQR)          | p-value | N                             | Median (IQR)          | p-value |
| <b>Overall</b>        | 46                     | 31.6 (19.4, 57.1) | p=0.29  | 46                            | -38.1% (-62.6, -4.5)  | p=0.07  | 42                            | -28.8% (-55.1, +29.7) | p=0.006 |
| <b>Responders</b>     | 16                     | 42.0 (24.3, 57.9) |         | 16                            | -51.4% (-72.6, -29.5) |         | 16                            | -49.6% (-76.5, -20.3) |         |
| <b>Non-responders</b> | 30                     | 30.2 (16.1, 57.1) |         | 30                            | -33.4% (-52.3, +5.5)  |         | 26                            | +2.1% (-43.6, +57.8)  |         |
