# Supplementary material
Source: PubMed Central journal article supplement (PMC6143169)
Supplement: NIHMS79445-supplement-Table_1.pdf [file NIHMS79445-supplement-Table_1.pdf]

**Supplemental Table S1.** Summary of tumor (baseline) and cfDNA (baseline and progression) mutations detected by WES for a patient who responded to Olaparib. New events in *TP53* and *TSC2* were detected at progression.

| GENE          | MUTATION      | TUMOR BIOPSY<br>(30% tumor<br>content) | BASELINE<br>cfDNA<br>(10% tumor<br>fraction) | PROGRESSION<br>cfDNA<br>(50% tumor<br>fraction) |
|---------------|---------------|----------------------------------------|----------------------------------------------|-------------------------------------------------|
| <b>TP53</b>   | <b>P60fs</b>  | <b>0</b>                               | <b>0</b>                                     | <b>0.47</b>                                     |
| <b>TSC2</b>   | <b>L1578Q</b> | <b>0</b>                               | <b>0</b>                                     | <b>0.13</b>                                     |
| <b>CTNNB1</b> | <b>T41A</b>   | <b>0.19</b>                            | <b>0.07</b>                                  | <b>0.25</b>                                     |
| <b>MRPL11</b> | <b>F167fs</b> | <b>0</b>                               | <b>0.07</b>                                  | <b>0.27</b>                                     |
| <b>PAX7</b>   | <b>S30T</b>   | <b>0</b>                               | <b>0.02</b>                                  | <b>0.3</b>                                      |
| LRFN5         | Q418K         | 0.18                                   | 0.09                                         | 0.25                                            |
| NEB           | D1195N        | 0.15                                   | 0.11                                         | 0.3                                             |
| RSG1          | R188W         | 0.23                                   | 0.08                                         | 0.28                                            |
| PLEC          | R179H         | 0.17                                   | 0.03                                         | 0.24                                            |
| GMCL1         | S443F         | 0.15                                   | 0.07                                         | 0.28                                            |
| MRPL9         | H88Y          | 0.16                                   | 0.02                                         | 0.24                                            |
| GRP162        | A227V         | 0.16                                   | 0.06                                         | 0.28                                            |
| PRDM9         | T18A          | 0.18                                   | 0.08                                         | 0.32                                            |
| PRDM8         | R635H         | 0.16                                   | 0.05                                         | 0.3                                             |
| MYO18A        | A2054T        | 0.16                                   | 0.06                                         | 0.31                                            |
| NES           | R766Q         | 0.22                                   | 0.13                                         | 0.38                                            |
| CAGE1         | N219D         | 0.2                                    | 0.06                                         | 0.31                                            |
| KMO           | F313Lfs*5     | 0.18                                   | 0.06                                         | 0.32                                            |
| SPRYD7        | S122R         | 0.21                                   | 0.07                                         | 0.33                                            |
| CCDC50        | R50fs*18      | 0.14                                   | 0.07                                         | 0.35                                            |
| GIT2          | D572V         | 0.18                                   | 0.04                                         | 0.33                                            |
| OTOP1         | A315T         | 0.14                                   | 0.06                                         | 0.36                                            |
| AHNAK2        | R656C         | 0.15                                   | 0.07                                         | 0.38                                            |
| SMCR8         | F626Sfs*3     | 0.18                                   | 0.07                                         | 0.39                                            |
| ANKRD34C      | R444*         | 0.16                                   | 0.08                                         | 0.41                                            |
| BRAT1         | A163V         | 0.2                                    | 0.05                                         | 0.41                                            |
| ENPP1         | L82M          | 0.17                                   | 0.21                                         | 0.58                                            |
| GOLGA4        | N1145T        | 0.2                                    | 0.03                                         | 0.43                                            |
| <b>HDAC2</b>  | <b>L371S</b>  | <b>0.17</b>                            | <b>0.01</b>                                  | <b>0</b>                                        |
| FOXA1         | Y259C         | 0.07                                   | 0                                            | 0                                               |
| TNIK          | R637H         | 0.16                                   | 0                                            | 0                                               |
| HCAR3         | T119M         | 0.19                                   | 0                                            | 0                                               |
