# Supplementary material
Source: PubMed Central journal article supplement (PMC6143169)

**Supplemental Figure S1.** Consort diagram describing samples disposition in the study.

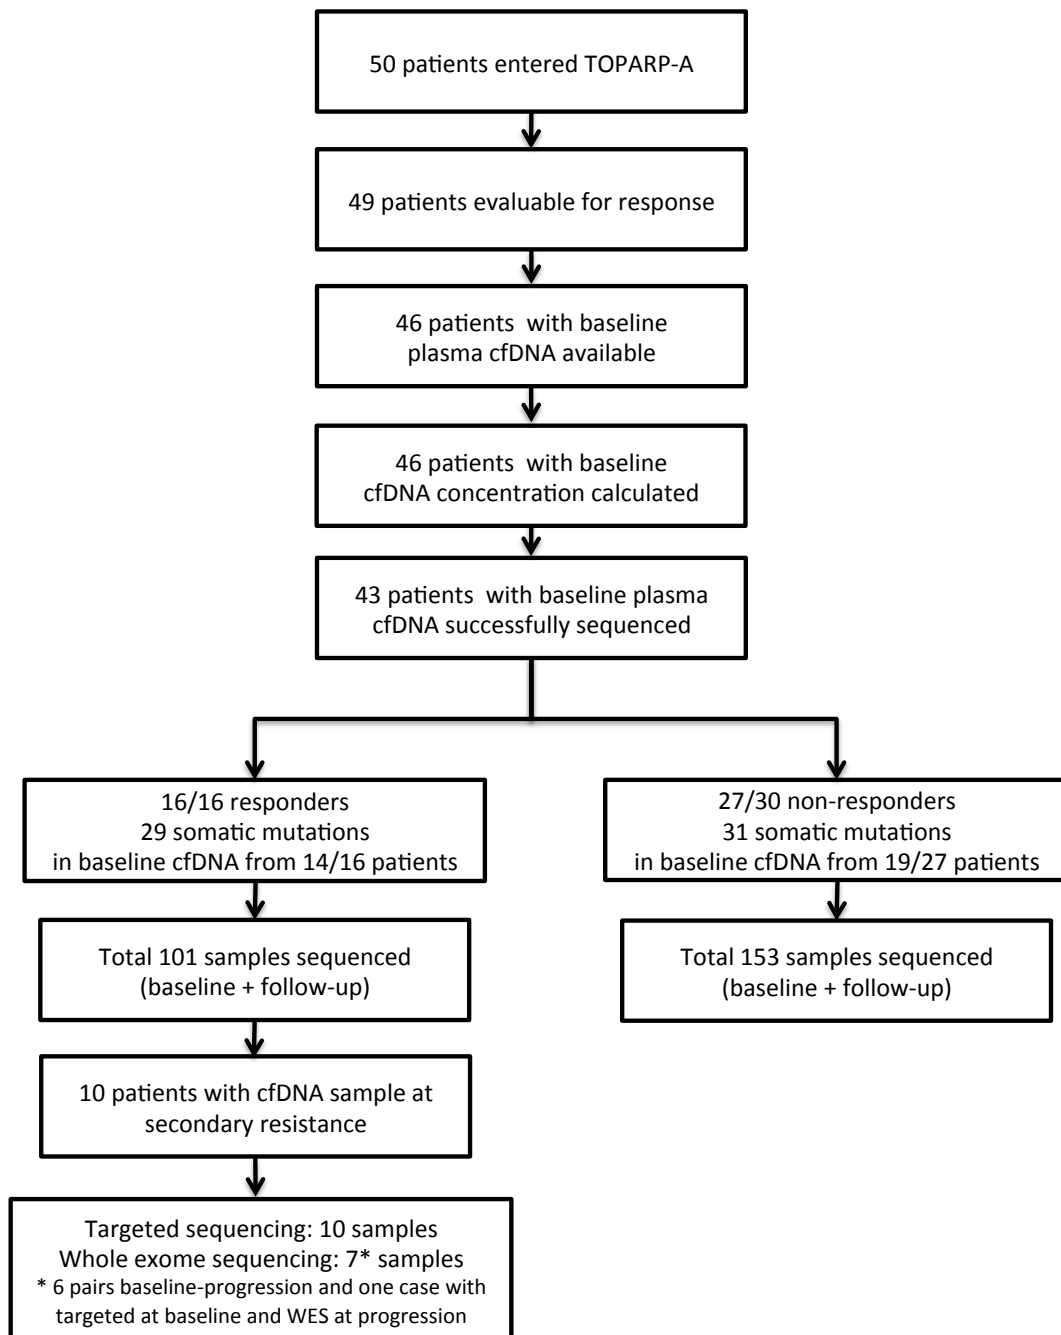

Supplement: NIHMS79445-supplement-Fig_1.pdf [file NIHMS79445-supplement-Fig_1.pdf]
